# Supplementary material
Source: PubMed Central journal article supplement (PMC3040099)
Supplement: NIHMS178040-supplement-FigS1__Table_S1.pdf [file NIHMS178040-supplement-FigS1__Table_S1.pdf]

**Figure S1.** Electron density for the C and D clusters. Maps show  $2F_o - F_c$  density contoured to 1.5 sigma. Clusters are shown as spheres with iron colored brown, sulfur colored yellow, and nickel colored green. A. D-cluster density. B. C-cluster density.

A.

D cluster

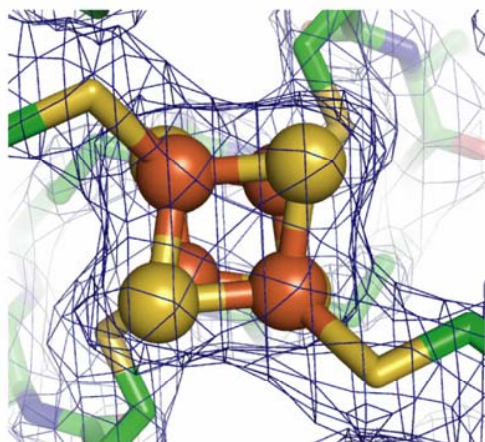

B.

C cluster

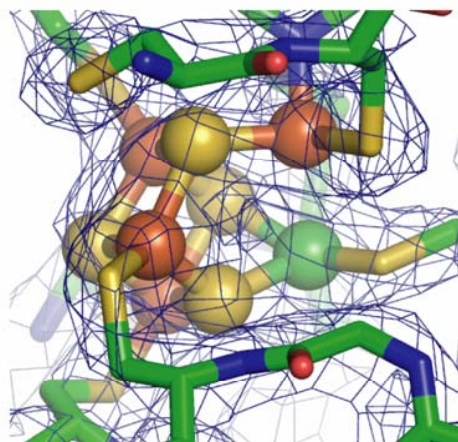

**Table S1.** Xe binding sites in mtCODH/ACS based on  $|F_{O_{Xe}}| - |F_{O_{Native}}|$  difference Fourier maps and refinement

| Xe sites | Channel 1, Mol 1 |          | Channel 2, Mol 1 |          | Channel 1, Mol 2 |          | Channel 2, Mol 2 |          | Neighboring residues, (atoms, and average distances)                                                                                                                                                                                                                                                                    |
|----------|------------------|----------|------------------|----------|------------------|----------|------------------|----------|-------------------------------------------------------------------------------------------------------------------------------------------------------------------------------------------------------------------------------------------------------------------------------------------------------------------------|
|          | Occ              | B-factor | Occ              | B-factor | Occ              | B-factor | Occ              | B-factor |                                                                                                                                                                                                                                                                                                                         |
| 1        | 0.13             | 32.32    | 0.15             | 23.79    | 0.19             | 34.46    | 0.09             | 13.77    | CODH residues: C468(SG-3.3), A590(CB-3.4), T602(CG2-3.6), W595(CD1-3.9), S579(C-4.0), G592(CA-4.0), H603(O-3.9), A578(C-4.5), I591(CG2-4.6)                                                                                                                                                                             |
| 2        | 1.00             | 25.33    | 1.00             | 27.34    | 0.86             | 29.20    | 1.00             | 33.81    | CODH residues: P608(CG-3.8), V102(CG2-3.9), A589(O3.9), T593(OG1-3.9), F632(CZ-3.9), I106(CD1-4.7)                                                                                                                                                                                                                      |
| 3A       | 0.56             | 26.65    | 0.60             | 30.46    | 0.48             | 28.75    | 0.51             | 29.28    | CODH residues: 3A: I106(CD1-3.7), L620(CD2-3.9), A234(CB-4.0), T593(CG2-4.0), M148(CE-4.0), E156(OE2-3.7), M182(SD-3.9), F184(CZ-4.7), Y221(CE1-3.7), A222(CA-4.0), I248(CG2-3.8).0, V231(CG1-4.4), V102(CG1-4.6).<br>3B: V102(CG1-3.4), A234(CB-3.8), A99(O-4.0), G103(N-4.4), V231(CA-4.4), I106(CD1-4.6), L230(O4.8) |
| B        | 0.35             | 25.68    | 0.19             | 14.04    | 0.26             | 30.93    | 0.30             | 33.15    |                                                                                                                                                                                                                                                                                                                         |
| 4        | 0.87             | 29.88    | 0.84             | 30.13    | 0.69             | 28.85    | 0.67             | 30.30    | CODH residues: L620(CD2-3.6), I235(CD1-3.8), V231(CG1-3.9), V596(CG1-4.0), T593(CG2-4.4), F632(CE2-4.2), A624(CB-4.5)                                                                                                                                                                                                   |
| 5        | 1.00             | 21.32    | 1.00             | 24.50    | 1.00             | 27.49    | 0.87             | 31.68    | CODH residues: V228(CG1-4.0), F232(CE1-4.2), I619(CG1-4.4), I623(CG2-3.8), V627(CG2-4.2)<br>ACS residues: T31(CG1-4.0), Y35(CG1-4.6)                                                                                                                                                                                    |
| 6        | 0.31             | 27.13    | 0.30             | 29.16    | 0.24             | 29.10    | 0.18             | 30.25    | ACS residues: T106(CG2-4.9), A110(CB-4.7), F212(O, 4.2), T213(CG2-4.1), I215(CG2-3.9), V261(CG1-3.4), A265(CB, 4.1), HOH877-3.6, HOH837-4.7                                                                                                                                                                             |
| 7        | 1.00             | 21.87    | 1.00             | 24.50    | 1.00             | 27.49    | 0.73             | 33.0     | ACS residues: W107(NE1-4.4), I158(CG2-4.5), L160(CD2-4.8), I215(CG1-4.0), V252(CG2-4.0), A265(O-3.8), A266(CA-4.3), A269(CB-4.3)                                                                                                                                                                                        |
| 8        | 0.19             | 25.25    |                  |          | 0.14             | 19.28    |                  |          | ACS residues: M148(CE-4.0), E156(OE2-3.7), M182(SD-3.9), F184(CZ-4.7), Y221(CE1-3.7), A222(CA-4.0), I248(CG2-3.8)                                                                                                                                                                                                       |
| 9        | 0.73             | 34.79    | 0.75             | 30.98    | 0.45             | 31.90    | 0.37             | 42.27    | ACS residues: Cu-3.7, Ni-3.9, G145(C-4.4), I146(N-4.8), V149(CG1-3.8), F229(CD1-3.2), C509(SG-4.2), F512(CB-4.9), C595(CB-4.2), G596(N-4.4), C597(CB-4.1)                                                                                                                                                               |
| 10       | 0.28             | 24.55    | 0.41             | 31.99    | 0.20             | 25.94    | 0.36             | 35.46    | ACS residues: S396(O-3.3), L287(CD1-3.73), A400(CB-3.8), T374(CG2-3.8), Y388(CD1-3.9), A397(N-4.0), I386(CD1-4.1), C350(SG-4.3), I291(CD1-4.45)                                                                                                                                                                         |
